# Supplementary material
Source: PubMed Central journal article supplement (PMC6952830)

## **Supplemental methods:**

### **Safety monitoring**

Failure of sirolimus therapy by day 42 post-randomization, defined as the addition of a systemic immune suppressive therapy beyond prednisone among those patients originally treated with sirolimus, was monitored using a sequential probability ratio test (SPRT) for binary data, contrasting a 25% and 50% 42-day rate of sirolimus failure. Day 56 mortality was monitored in both study arms using a censored exponential SPRT contrasting a 10% and 25% rate of overall mortality.

Research was IRB-approved, and conducted in accordance with the Declaration of Helsinki.

### **Adjudication of GVHD response data**

GVHD organ scores were recorded by the study site investigators. From these serial organ scores, responses were computed using the standard definitions reported in the manuscript. For Endpoint Review Committee (ERC) adjudications, reviewers were provided with data listings containing pertinent data including acute GVHD symptoms, etiologies, biopsies, and treatment as well as other relevant outcomes such as infections and adverse events. These listings were blinded to participant/center identifiers and Ann Arbor (AA) Score. Two reviewers were assigned to perform independent reviews of endpoints for each patient. If there were any discrepancies among the two reviewers, the case was assigned to a third reviewer. Once a consensus was reached among reviewers, the results represented the ERC adjudicated endpoints for the participant under review.

**Supplemental tables:**

**Supplemental table 1: Detailed response categories at day 28 and 56 for the prednisone vs. sirolimus study arms**

| <b>Acute GVHD Response</b> |                            |                                        |                                       |                 |
|----------------------------|----------------------------|----------------------------------------|---------------------------------------|-----------------|
| <b>Assessment Time</b>     | <b>Response Category</b>   | <b>Prednisone<br/>(N=64)<br/>N (%)</b> | <b>Sirolimus<br/>(N=58)<br/>N (%)</b> | <b>p-value*</b> |
| <b>Day 28</b>              | Complete Response (CR)     | 39 (61.9%)                             | 30 (55.6%)                            | 0.320           |
|                            | Partial Response (PR)      | 7 (11.1%)                              | 5 (9.3%)                              |                 |
|                            | Mixed Response (MR)        | 5 (7.9%)                               | 1 (1.9%)                              |                 |
|                            | No Response (NR)           | 11 (17.5%)                             | 16 (29.6%)                            |                 |
|                            | Progression                | 1 (1.6%)                               | 2 (3.7%)                              |                 |
|                            | Not Evaluable <sup>1</sup> | 1                                      | 4                                     |                 |
| <b>Day 56</b>              | Complete Response (CR)     | 48 (76.2%)                             | 30 (56.6%)                            | 0.014           |
|                            | Partial Response (PR)      | 2 (3.2%)                               | 4 (7.5%)                              |                 |
|                            | Mixed Response (MR)        | 0 (0.0%)                               | 0 (0.0%)                              |                 |
|                            | No Response (NR)           | 10 (15.9%)                             | 19 (35.8%)                            |                 |
|                            | Progression                | 3 (4.8%)                               | 0 (0.0%)                              |                 |
|                            | Not Evaluable <sup>2</sup> | 1                                      | 5                                     |                 |

\* Fisher's exact test

<sup>1</sup> Five participants were deemed unevaluable due to their withdrawal from the study prior to day 28.

<sup>2</sup> Six participants were deemed unevaluable. One participant on the prednisone arm withdrew from the study prior to day 56. On the sirolimus arm, four participants withdrew from the study prior to day 56 and one had a missing GVHD staging evaluation at day 56.

Supplemental table 2: (a) Grade 3-5 toxicities, (b) serious grade 3-5 adverse events, and (c) causes of death according to study arm

(a)

|                               | Treatment Arm                 |                              | Total<br>(N=122)<br>N (%) |
|-------------------------------|-------------------------------|------------------------------|---------------------------|
|                               | Prednisone<br>(N=64)<br>N (%) | Sirolimus<br>(N=58)<br>N (%) |                           |
| <b>Maximum Toxicity Grade</b> |                               |                              |                           |
| Grade 0 - 2                   | 25 (39.1%)                    | 31 (53.4%)                   | 56 (45.9%)                |
| Grade 3                       | 27 (42.2%)                    | 19 (32.8%)                   | 46 (37.7%)                |
| Grade 4                       | 9 (14.1%)                     | 7 (12.1%)                    | 16 (13.1%)                |
| Grade 5                       | 3 (4.7%)                      | 1 (1.7%)                     | 4 (3.3%)                  |
| <b>Oral Mucositis</b>         |                               |                              |                           |
| Grade 0 - 2                   | 63 (98.4%)                    | 54 (93.1%)                   | 117 (95.9%)               |
| Grade 3                       | 1 (1.6%)                      | 4 (6.9%)                     | 5 (4.1%)                  |
| <b>Cystitis Non-infective</b> |                               |                              |                           |
| Grade 0 - 2                   | 61 (95.3%)                    | 58 (100.0%)                  | 119 (97.5%)               |
| Grade 3                       | 3 (4.7%)                      | 0 (0.0%)                     | 3 (2.5%)                  |
| <b>Acute Kidney Injury</b>    |                               |                              |                           |
| Grade 0 - 2                   | 60 (93.8%)                    | 54 (93.1%)                   | 114 (93.4%)               |
| Grade 3                       | 4 (6.3%)                      | 3 (5.2%)                     | 7 (5.7%)                  |
| Grade 4                       | 0 (0.0%)                      | 1 (1.7%)                     | 1 (0.8%)                  |
| <b>Chronic Kidney Disease</b> |                               |                              |                           |
| Grade 0 - 2                   | 62 (96.9%)                    | 56 (96.6%)                   | 118 (96.7%)               |
| Grade 3                       | 1 (1.6%)                      | 2 (3.4%)                     | 3 (2.5%)                  |
| Grade 4                       | 1 (1.6%)                      | 0 (0.0%)                     | 1 (0.8%)                  |
| <b>Received Dialysis</b>      |                               |                              |                           |
| Yes                           | 4 (6.3%)                      | 2 (3.4%)                     | 6 (4.9%)                  |
| No                            | 60 (93.8%)                    | 56 (96.6%)                   | 116 (95.1%)               |
| <b>Hemorrhage</b>             |                               |                              |                           |
| Grade 0 - 2                   | 59 (92.2%)                    | 54 (93.1%)                   | 113 (92.6%)               |
| Grade 3                       | 3 (4.7%)                      | 2 (3.4%)                     | 5 (4.1%)                  |
| Grade 4                       | 2 (3.1%)                      | 2 (3.4%)                     | 4 (3.3%)                  |
| <b>Hypotension</b>            |                               |                              |                           |
| Grade 0 - 2                   | 55 (85.9%)                    | 44 (75.9%)                   | 99 (81.1%)                |
| Grade 3                       | 6 (9.4%)                      | 10 (17.2%)                   | 16 (13.1%)                |
| Grade 4                       | 2 (3.1%)                      | 4 (6.9%)                     | 6 (4.9%)                  |
| Grade 5                       | 1 (1.6%)                      | 0 (0.0%)                     | 1 (0.8%)                  |
| <b>Hypertension</b>           |                               |                              |                           |
| Grade 0 - 2                   | 50 (78.1%)                    | 47 (81.0%)                   | 97 (79.5%)                |
| Grade 3                       | 14 (21.9%)                    | 11 (19.0%)                   | 25 (20.5%)                |
| <b>Cardiac Arrhythmia</b>     |                               |                              |                           |
| Grade 0 - 2                   | 62 (96.9%)                    | 56 (96.6%)                   | 118 (96.7%)               |
| Grade 3                       | 1 (1.6%)                      | 1 (1.7%)                     | 2 (1.6%)                  |

|                                              | Treatment Arm                 |                              | Total<br>(N=122)<br>N (%) |
|----------------------------------------------|-------------------------------|------------------------------|---------------------------|
|                                              | Prednisone<br>(N=64)<br>N (%) | Sirolimus<br>(N=58)<br>N (%) |                           |
| Grade 5                                      | 1 (1.6%)                      | 1 (1.7%)                     | 2 (1.6%)                  |
| <b>Left Ventricular Systolic Dysfunction</b> |                               |                              |                           |
| Grade 0 - 2                                  | 62 (96.9%)                    | 58 (100.0%)                  | 120 (98.4%)               |
| Grade 4                                      | 1 (1.6%)                      | 0 (0.0%)                     | 1 (0.8%)                  |
| Grade 5                                      | 1 (1.6%)                      | 0 (0.0%)                     | 1 (0.8%)                  |
| <b>Somnolence</b>                            |                               |                              |                           |
| Grade 0 - 2                                  | 62 (96.9%)                    | 52 (89.7%)                   | 114 (93.4%)               |
| Grade 3                                      | 2 (3.1%)                      | 5 (8.6%)                     | 7 (5.7%)                  |
| Grade 4                                      | 0 (0.0%)                      | 1 (1.7%)                     | 1 (0.8%)                  |
| <b>Seizure</b>                               |                               |                              |                           |
| Grade 0 - 2                                  | 63 (98.4%)                    | 58 (100.0%)                  | 121 (99.2%)               |
| Grade 4                                      | 1 (1.6%)                      | 0 (0.0%)                     | 1 (0.8%)                  |
| <b>Thrombotic Thrombocytopenic Purpura</b>   |                               |                              |                           |
| Grade 0 - 2                                  | 63 (98.4%)                    | 55 (94.8%)                   | 118 (96.7%)               |
| Grade 3                                      | 1 (1.6%)                      | 2 (3.4%)                     | 3 (2.5%)                  |
| Grade 4                                      | 0 (0.0%)                      | 1 (1.7%)                     | 1 (0.8%)                  |
| <b>Capillary Leak Syndrome</b>               |                               |                              |                           |
| Grade 0 - 2                                  | 64 (100.0%)                   | 58 (100.0%)                  | 122 (100.0%)              |
| <b>Hypoxia</b>                               |                               |                              |                           |
| Grade 0 - 2                                  | 53 (82.8%)                    | 46 (79.3%)                   | 99 (81.1%)                |
| Grade 3                                      | 4 (6.3%)                      | 6 (10.3%)                    | 10 (8.2%)                 |
| Grade 4                                      | 5 (7.8%)                      | 5 (8.6%)                     | 10 (8.2%)                 |
| Grade 5                                      | 2 (3.1%)                      | 1 (1.7%)                     | 3 (2.5%)                  |
| <b>Dyspnea</b>                               |                               |                              |                           |
| Grade 0 - 2                                  | 54 (84.4%)                    | 48 (82.8%)                   | 102 (83.6%)               |
| Grade 3                                      | 3 (4.7%)                      | 5 (8.6%)                     | 8 (6.6%)                  |
| Grade 4                                      | 5 (7.8%)                      | 4 (6.9%)                     | 9 (7.4%)                  |
| Grade 5                                      | 2 (3.1%)                      | 1 (1.7%)                     | 3 (2.5%)                  |
| <b>ALT</b>                                   |                               |                              |                           |
| Grade 0 - 2                                  | 53 (82.8%)                    | 52 (89.7%)                   | 105 (86.1%)               |
| Grade 3                                      | 10 (15.6%)                    | 6 (10.3%)                    | 16 (13.1%)                |
| Grade 4                                      | 1 (1.6%)                      | 0 (0.0%)                     | 1 (0.8%)                  |
| <b>AST</b>                                   |                               |                              |                           |
| Grade 0 - 2                                  | 58 (90.6%)                    | 52 (89.7%)                   | 110 (90.2%)               |
| Grade 3                                      | 6 (9.4%)                      | 5 (8.6%)                     | 11 (9.0%)                 |
| Grade 4                                      | 0 (0.0%)                      | 1 (1.7%)                     | 1 (0.8%)                  |
| <b>Bilirubin</b>                             |                               |                              |                           |
| Grade 0 - 2                                  | 58 (90.6%)                    | 55 (94.8%)                   | 113 (92.6%)               |
| Grade 3                                      | 5 (7.8%)                      | 2 (3.4%)                     | 7 (5.7%)                  |
| Grade 4                                      | 1 (1.6%)                      | 1 (1.7%)                     | 2 (1.6%)                  |
| <b>Alkaline Phosphate</b>                    |                               |                              |                           |
| Grade 0 - 2                                  | 62 (96.9%)                    | 56 (96.6%)                   | 118 (96.7%)               |
| Grade 3                                      | 1 (1.6%)                      | 2 (3.4%)                     | 3 (2.5%)                  |
| Grade 4                                      | 1 (1.6%)                      | 0 (0.0%)                     | 1 (0.8%)                  |

|                                   | Treatment Arm                 |                              | Total<br>(N=122)<br>N (%) |
|-----------------------------------|-------------------------------|------------------------------|---------------------------|
|                                   | Prednisone<br>(N=64)<br>N (%) | Sirolimus<br>(N=58)<br>N (%) |                           |
| <b>Abnormal Liver Symptoms</b>    |                               |                              |                           |
| Yes                               | 7 (10.9%)                     | 3 (5.2%)                     | 10 (8.2%)                 |
| No                                | 57 (89.1%)                    | 55 (94.8%)                   | 112 (91.8%)               |
| <b>Veno-occlusive Disease</b>     |                               |                              |                           |
| Yes                               | 0 (0.0%)                      | 1 (1.7%)                     | 1 (0.8%)                  |
| No                                | 64 (100.0%)                   | 57 (98.3%)                   | 121 (99.2%)               |
| <b>Thrombotic Microangiopathy</b> |                               |                              |                           |
| Yes                               | 1 (1.6%)                      | 6 (10.3%)                    | 7 (5.7%)                  |
| No                                | 63 (98.4%)                    | 52 (89.7%)                   | 115 (94.3%)               |

(b)

| Serious Adverse Event                           |                              | Prednisone |              |                   | Sirolimus |              |                   |
|-------------------------------------------------|------------------------------|------------|--------------|-------------------|-----------|--------------|-------------------|
|                                                 |                              | Events     | Participants | % of participants | Events    | Participants | % of participants |
| System Organ Class                              | Preferred Term               |            |              |                   |           |              |                   |
| Gastrointestinal disorders                      | Small intestinal obstruction | 0          | 0            | 0.00%             | 1         | 1            | 1.72%             |
| Hepatobiliary disorders                         | Hepatic cirrhosis            | 0          | 0            | 0.00%             | 1         | 1            | 1.72%             |
| Infections and infestations                     | Appendicitis                 | 0          | 0            | 0.00%             | 1         | 1            | 1.72%             |
|                                                 | Diverticulitis               | 0          | 0            | 0.00%             | 1         | 1            | 1.72%             |
|                                                 | Pneumonia                    | 0          | 0            | 0.00%             | 1         | 1            | 1.72%             |
| Metabolism and nutrition disorders              | Failure to thrive            | 0          | 0            | 0.00%             | 1         | 1            | 1.72%             |
| Psychiatric disorders                           | Delirium                     | 1          | 1            | 1.56%             | 0         | 0            | 0.00%             |
|                                                 | Mental status changes        | 0          | 0            | 0.00%             | 1         | 1            | 1.72%             |
| Renal and urinary disorders                     | Cystitis non-infective       | 1          | 1            | 1.56%             | 0         | 0            | 0.00%             |
| Respiratory, thoracic and mediastinal disorders | Hypoxia                      | 1          | 1            | 1.56%             | 0         | 0            | 0.00%             |
|                                                 | Pulmonary embolism           | 0          | 0            | 0.00%             | 1         | 1            | 1.72%             |
| <b>Total Serious Adverse Events</b>             |                              | <b>3</b>   | <b>3</b>     | <b>4.69%</b>      | <b>8</b>  | <b>8</b>     | <b>13.79%</b>     |

(c)

| Primary Cause of Death           | Prednisone |              | Sirolimus |              | All       |              |
|----------------------------------|------------|--------------|-----------|--------------|-----------|--------------|
|                                  | N          | %            | N         | %            | N         | %            |
| Recurrence/Persistence           | 6          | 35.3         | 2         | 16.7         | 8         | 27.6         |
| Graft Rejection/Failure          | 1          | 5.9          | 0         | 0            | 1         | 3.4          |
| Acute GVHD                       | 1          | 5.9          | 0         | 0            | 1         | 3.4          |
| Infection <sup>1</sup>           | 1          | 5.9          | 4         | 33.3         | 5         | 17.2         |
| Multiple Organ Failure           | 3          | 17.6         | 2         | 16.7         | 5         | 17.2         |
| Interstitial Pneumonia           | 1          | 5.9          | 0         | 0            | 1         | 3.4          |
| Other <sup>2</sup>               | 4          | 23.5         | 3         | 25.0         | 7         | 24.1         |
| Unknown                          | 0          | 0            | 1         | 8.3          | 1         | 3.4          |
| <b>Total</b>                     | <b>17</b>  | <b>100.0</b> | <b>12</b> | <b>100.0</b> | <b>29</b> | <b>100.0</b> |
| <b>Total Deaths</b>              |            |              |           |              |           |              |
|                                  | 17         | 26.6         | 12        | 20.7         | 29        | 23.8         |
| <b>Total Enrolled/Analyzable</b> |            |              |           |              |           |              |
|                                  | 64         | 100.0        | 58        | 100.0        | 122       | 100.0        |

<sup>1</sup> Prednisone arm: n=1 total death, bacterial blood infection. Sirolimus arm: n=4 total deaths; type was bacterial (n=2), viral (n=1), and fungal (n=1); sites of infection were lung (n=2), stool (n=1), and other (n=1).

<sup>2</sup> Prednisone arm: respiratory failure (n=1), undifferentiated pneumonitis (n=1), brainstem CVA (n=1), sepsis (n=1)  
Sirolimus arm: respiratory failure (n=1), occipital lobe CVA (n=1), aspiration or embolic phenomenon (n=1)

**Supplemental table 3: Systemic infections reported on trial according to study arm**

|                                         |                                                                  | <b>Prednisone<br/>(N=64)<br/>N (%)</b> | <b>Sirolimus<br/>(N=58)<br/>N (%)</b> |
|-----------------------------------------|------------------------------------------------------------------|----------------------------------------|---------------------------------------|
| <b>Total Number of Infections</b>       |                                                                  | 66 (100.0%)                            | 61<br>(100.0%)                        |
| <b>Infection Site</b>                   | Blood/Bufy Coat                                                  | 19 (28.8%)                             | 13 (21.3%)                            |
|                                         | Disseminated - Generalized, Isolated at 2 or More Distinct Sites | 2 (3.0%)                               | 1 (1.6%)                              |
|                                         | Brain                                                            | 2 (3.0%)                               | 0 (0.0%)                              |
|                                         | Small Intestine                                                  | 0 (0.0%)                               | 1 (1.6%)                              |
|                                         | Large Intestine                                                  | 1 (1.5%)                               | 1 (1.6%)                              |
|                                         | Feces/Stool                                                      | 4 (6.1%)                               | 5 (8.2%)                              |
|                                         | Gastrointestinal Tract Unspecified                               | 2 (3.0%)                               | 1 (1.6%)                              |
|                                         | Upper Airway and Nasopharynx                                     | 6 (9.1%)                               | 6 (9.8%)                              |
|                                         | Lower Respiratory Tract (Lung)                                   | 7 (10.6%)                              | 10 (16.4%)                            |
|                                         | Sinuses                                                          | 2 (3.0%)                               | 1 (1.6%)                              |
|                                         | Respiratory Tract Unspecified                                    | 5 (7.6%)                               | 5 (8.2%)                              |
|                                         | Kidneys, Renal Pelvis, Ureters and Bladder                       | 2 (3.0%)                               | 2 (3.3%)                              |
|                                         | Genito-Urinary Tract Unspecified                                 | 3 (4.5%)                               | 3 (4.9%)                              |
|                                         | Genital Area                                                     | 0 (0.0%)                               | 1 (1.6%)                              |
|                                         | Rash, Pustules, or Abscesses Not Typical of Any of the Above     | 0 (0.0%)                               | 2 (3.3%)                              |
|                                         | Skin Unspecified                                                 | 4 (6.1%)                               | 0 (0.0%)                              |
|                                         | Wound site                                                       | 0 (0.0%)                               | 7 (11.5%)                             |
|                                         | Joints                                                           | 2 (3.0%)                               | 0 (0.0%)                              |
|                                         | Bone Marrow                                                      | 0 (0.0%)                               | 1 (1.6%)                              |
|                                         | Other Unspecified                                                | 5 (7.6%)                               | 1 (1.6%)                              |
| <b>Time of Onset Post-randomization</b> | Median days (Range)                                              | 78 (2-334)                             | 105 (0-358)                           |
|                                         | 0 - 90 days                                                      | 33 (50.0%)                             | 28 (45.9%)                            |
|                                         | 91 - 180 days                                                    | 11 (16.7%)                             | 17 (27.9%)                            |
|                                         | 181 - 270 days                                                   | 9 (13.6%)                              | 7 (11.5%)                             |
|                                         | 271 - 365 days                                                   | 13 (19.7%)                             | 9 (14.8%)                             |
| <b>Infection Severity</b>               | Grade 2 (Moderate)                                               | 44 (66.7%)                             | 48 (78.7%)                            |
|                                         | Grade 3 (Severe / Life Threatening)                              | 22 (33.3%)                             | 13 (21.3%)                            |

**Supplemental table 4: Change from baseline to subsequent measures and comparison of change across study groups for functional myopathy assessment tools. (a) Hip flexor strength. (b) quadriceps strength. (c) two minute walk test. (d) 5 time sit-to-stand test time. (e) Adult myopathy assessment tool score.**

(a)

| Assessment Time | Prednisone |                  |                      | Sirolimus |                  |                      | Treatment Comparison p-value <sup>2</sup> |
|-----------------|------------|------------------|----------------------|-----------|------------------|----------------------|-------------------------------------------|
|                 | N          | Median (Range)   | p-value <sup>1</sup> | N         | Median (Range)   | p-value <sup>1</sup> |                                           |
| Baseline        | 51         | 14.8 (3.3, 91.0) | -                    | 45        | 14.8 (3.3, 72.5) | -                    | -                                         |
| Day 56          | 43         | 14.0 (2.8, 93.5) | 0.408                | 31        | 14.0 (3.0, 86.0) | 0.307                | 0.986                                     |
| Day 180         | 35         | 16.3 (3.5, 77.8) | 0.563                | 20        | 18.5 (7.3, 89.5) | 0.265                | 0.579                                     |

(b)

| Assessment Time | Prednisone |                  |                      | Sirolimus |                  |                      | Treatment Comparison p-value <sup>2</sup> |
|-----------------|------------|------------------|----------------------|-----------|------------------|----------------------|-------------------------------------------|
|                 | N          | Median (Range)   | p-value <sup>1</sup> | N         | Median (Range)   | p-value <sup>1</sup> |                                           |
| Baseline        | 51         | 15.0 (3.3, 90.8) | -                    | 44        | 14.5 (3.0, 50.5) | -                    | -                                         |
| Day 56          | 43         | 16.5 (4.0, 98.3) | 0.539                | 31        | 15.5 (2.8, 68.5) | 0.302                | 0.749                                     |
| Day 180         | 35         | 17.3 (4.8, 58.0) | 0.807                | 20        | 20.5 (4.3, 94.3) | 0.462                | 0.522                                     |

1 Wilcoxon signed rank tests on changes in scores from baseline within each arm

2 Wilcoxon rank sum tests comparing changes in scores from baseline between arms

(c)

| Assessment Time | Prednisone |                    |                      | Sirolimus |                    |                      | Treatment Comparison p-value <sup>2</sup> |
|-----------------|------------|--------------------|----------------------|-----------|--------------------|----------------------|-------------------------------------------|
|                 | N          | Median (Range)     | p-value <sup>1</sup> | N         | Median (Range)     | p-value <sup>1</sup> |                                           |
| Baseline        | 53         | 124.0 (0.0, 628.0) | -                    | 42        | 97.5 (0.0, 600.0)  | -                    | -                                         |
| Day 56          | 42         | 138.0 (0.0, 634.0) | 0.006                | 33        | 132.0 (0.0, 600.0) | 0.001                | 0.781                                     |
| Day 180         | 36         | 124.5 (0.0, 426.0) | 0.939                | 21        | 130.0 (0.0, 600.0) | 0.132                | 0.091                                     |

Note: For participants that could not complete the Two Minute Walk Test, a distance of zero meters was recorded.

1 Wilcoxon signed rank tests on changes in scores from baseline within each arm

2 Wilcoxon rank sum tests comparing changes in scores from baseline between arms

(d)

| Assessment Time | Prednisone |                   |                      | Sirolimus |                   |                      | Treatment Comparison p-value <sup>2</sup> |
|-----------------|------------|-------------------|----------------------|-----------|-------------------|----------------------|-------------------------------------------|
|                 | N          | Median (Range)    | p-value <sup>1</sup> | N         | Median (Range)    | p-value <sup>1</sup> |                                           |
| Baseline        | 55         | 15.0 (7.0, 300.0) | -                    | 46        | 16.0 (7.0, 300.0) | -                    | -                                         |



|                 | Prednisone |                   |                      | Sirolimus |                   |                      |                                           |
|-----------------|------------|-------------------|----------------------|-----------|-------------------|----------------------|-------------------------------------------|
| Assessment Time | N          | Median (Range)    | p-value <sup>1</sup> | N         | Median (Range)    | p-value <sup>1</sup> | Treatment Comparison p-value <sup>2</sup> |
| Day 56          | 44         | 14.5 (6.0, 300.0) | 0.324                | 33        | 15.0 (0.0, 300.0) | 0.701                | 0.365                                     |
| Day 180         | 36         | 13.5 (5.0, 300.0) | 0.622                | 20        | 13.0 (6.0, 300.0) | 0.907                | 0.966                                     |

Note: For participants that could not complete the 5 Time Sit-to-Stand Test, a time of 300 seconds was recorded. Medians should be interpreted as restricted medians.

1 Wilcoxon signed rank tests on changes in scores from baseline within each arm

2 Wilcoxon rank sum tests comparing changes in scores from baseline between arms

(e)

|                 | Prednisone |                  |                      | Sirolimus |                   |                      |                                           |
|-----------------|------------|------------------|----------------------|-----------|-------------------|----------------------|-------------------------------------------|
| Assessment Time | N          | Median (Range)   | p-value <sup>1</sup> | N         | Median (Range)    | p-value <sup>1</sup> | Treatment Comparison p-value <sup>2</sup> |
| Baseline        | 55         | 17.0 (8.0, 18.0) | -                    | 45        | 17.0 (9.0, 18.0)  | -                    | -                                         |
| Day 56          | 44         | 18.0 (0.0, 18.0) | 0.975                | 33        | 18.0 (0.0, 18.0)  | 0.079                | 0.182                                     |
| Day 180         | 36         | 18.0 (6.0, 18.0) | 0.645                | 21        | 18.0 (14.0, 18.0) | 0.086                | 0.105                                     |

1 Wilcoxon signed rank tests on changes in scores from baseline within each arm

2 Wilcoxon rank sum tests comparing changes in scores from baseline between arms

**Supplemental table 5: Change from baseline to subsequent measures and comparison of change across study groups for functional myopathy assessment tools. Comparisons are made across the prednisone arm of the trial, sirolimus-treated subjects that did not receive steroids by day 56 post-randomization, and sirolimus-treated subjects that did receive steroids by day 56 post-randomization: (a) Hip flexor strength. (b) quadriceps strength. (c) two minute walk test. (d) 5 time sit-to-stand test time. (e) adult myopathy assessment tool (AMAT) score.**

**(A)**

| Assessment Time | Prednisone |                  |                      | Sirolimus, No Steroids <sup>1</sup> |                  |                      | Sirolimus, Got Steroids <sup>2</sup> |                  |                      |
|-----------------|------------|------------------|----------------------|-------------------------------------|------------------|----------------------|--------------------------------------|------------------|----------------------|
|                 | N          | Median (Range)   | p-value <sup>3</sup> | N                                   | Median (Range)   | p-value <sup>3</sup> | N                                    | Median (Range)   | p-value <sup>3</sup> |
| <b>Baseline</b> | 51         | 14.8 (3.3, 91.0) | -                    | 26                                  | 12.5 (3.3, 53.8) | -                    | 19                                   | 15.5 (7.8, 72.5) | -                    |
| <b>Day 56</b>   | 43         | 14.0 (2.8, 93.5) | 0.408                | 22                                  | 14.4 (3.0, 86.0) | 0.393                | 9                                    | 14.0 (4.3, 22.8) | 0.465                |
| <b>Day 180</b>  | 35         | 16.3 (3.5, 77.8) | 0.563                | 16                                  | 22.0 (8.3, 89.5) | 0.051                | 4                                    | 7.6 (7.3, 11.8)  | 0.125                |

<sup>1</sup> Sirolimus arm patients that did not receive steroids before Day 56 post-randomization

<sup>2</sup> Sirolimus arm patients that did receive steroids before Day 56 post-randomization

<sup>3</sup> Wilcoxon signed rank tests on changes in scores from baseline within each group

| <b>P-values<sup>4</sup> for Comparisons of Change Scores in Hip Flexor Strength</b> |                        |                |
|-------------------------------------------------------------------------------------|------------------------|----------------|
|                                                                                     | <b>Assessment Time</b> |                |
|                                                                                     | <b>Day 56</b>          | <b>Day 180</b> |
| <b>Prednisone vs. Sirolimus, No Steroids</b>                                        | 1.000                  | 0.570          |
| <b>Prednisone vs. Sirolimus, Got Steroids</b>                                       | 1.000                  | 0.402          |
| <b>Sirolimus, No Steroids vs. Sirolimus, Got Steroids</b>                           | 1.000                  | 0.078          |

<sup>4</sup> Wilcoxon rank sum tests were used to compare changes in scores from baseline between each pair of treatment groups. Across each time point, p-values are Bonferroni-corrected for the three pairwise comparisons.

(B)

| Assessment Time | Prednisone |                  |                      | Sirolimus, No Steroids <sup>1</sup> |                  |                      | Sirolimus, Got Steroids <sup>2</sup> |                  |                      |
|-----------------|------------|------------------|----------------------|-------------------------------------|------------------|----------------------|--------------------------------------|------------------|----------------------|
|                 | N          | Median (Range)   | p-value <sup>3</sup> | N                                   | Median (Range)   | p-value <sup>3</sup> | N                                    | Median (Range)   | p-value <sup>3</sup> |
| Baseline        | 51         | 15.0 (3.3, 90.8) | -                    | 25                                  | 13.8 (3.0, 47.0) | -                    | 19                                   | 15.8 (7.3, 50.5) | -                    |
| Day 56          | 43         | 16.5 (4.0, 98.3) | 0.539                | 22                                  | 15.8 (3.0, 68.5) | 0.447                | 9                                    | 15.3 (2.8, 29.5) | 0.742                |
| Day 180         | 35         | 17.3 (4.8, 58.0) | 0.807                | 16                                  | 21.1 (8.8, 94.3) | 0.318                | 4                                    | 7.8 (4.3, 23.8)  | 0.875                |

<sup>1</sup> Sirolimus arm patients that did not receive steroids before Day 56 post-randomization

<sup>2</sup> Sirolimus arm patients that did receive steroids before Day 56 post-randomization

<sup>3</sup> Wilcoxon signed rank tests on changes in scores from baseline within each group

|                                                           | Assessment Time                                                                     |         |
|-----------------------------------------------------------|-------------------------------------------------------------------------------------|---------|
|                                                           | Day 56                                                                              | Day 180 |
|                                                           | <b>P-values<sup>4</sup> for Comparisons of Change Scores in Quadriceps Strength</b> |         |
| <b>Prednisone vs. Sirolimus, No Steroids</b>              | 1.000                                                                               | 1.000   |
| <b>Prednisone vs. Sirolimus, Got Steroids</b>             | 1.000                                                                               | 1.000   |
| <b>Sirolimus, No Steroids vs. Sirolimus, Got Steroids</b> | 1.000                                                                               | 1.000   |

<sup>4</sup> Wilcoxon rank sum tests were used to compare changes in scores from baseline between each pair of treatment groups. Across each time point, p-values are Bonferroni-corrected for the three pairwise comparisons.

(C)

| Assessment Time | Prednisone |                    |                      | Sirolimus, No Steroids <sup>1</sup> |                    |                      | Sirolimus, Got Steroids <sup>2</sup> |                     |                      |
|-----------------|------------|--------------------|----------------------|-------------------------------------|--------------------|----------------------|--------------------------------------|---------------------|----------------------|
|                 | N          | Median (Range)     | p-value <sup>3</sup> | N                                   | Median (Range)     | p-value <sup>3</sup> | N                                    | Median (Range)      | p-value <sup>3</sup> |
| Baseline        | 53         | 124.0 (0.0, 628.0) | -                    | 23                                  | 129.0 (0.0, 600.0) | -                    | 19                                   | 86.0 (0.0, 587.0)   | -                    |
| Day 56          | 42         | 138.0 (0.0, 634.0) | 0.006                | 23                                  | 132.0 (0.0, 600.0) | 0.056                | 10                                   | 133.5 (0.0, 499.0)  | 0.004                |
| Day 180         | 36         | 124.5 (0.0, 426.0) | 0.939                | 17                                  | 130.0 (0.0, 600.0) | 0.542                | 4                                    | 128.0 (69.0, 512.0) | 0.125                |

Note: For participants that could not complete the Two Minute Walk Test, a distance of zero meters was recorded.

<sup>1</sup> Sirolimus arm patients that did not receive steroids before Day 56 post-randomization

<sup>2</sup> Sirolimus arm patients that did receive steroids before Day 56 post-randomization

<sup>3</sup> Wilcoxon signed rank tests on changes in scores from baseline within each group

|                                                           | Assessment Time                                                                      |         |
|-----------------------------------------------------------|--------------------------------------------------------------------------------------|---------|
|                                                           | Day 56                                                                               | Day 180 |
|                                                           | <b>P-values<sup>4</sup> for Comparisons of Change Scores in Two Minute Walk Test</b> |         |
| <b>Prednisone vs. Sirolimus, No Steroids</b>              | 1.000                                                                                | 1.000   |
| <b>Prednisone vs. Sirolimus, Got Steroids</b>             | 0.660                                                                                | 0.060   |
| <b>Sirolimus, No Steroids vs. Sirolimus, Got Steroids</b> | 0.756                                                                                | 0.297   |

<sup>4</sup> Wilcoxon rank sum tests were used to compare changes in scores from baseline between each pair of treatment groups. Across each time point, p-values are Bonferroni-corrected for the three pairwise comparisons.

(D)

| Assessment Time | Prednisone |                   |                      | Sirolimus, No Steroids <sup>1</sup> |                   |                      | Sirolimus, Got Steroids <sup>2</sup> |                   |                      |
|-----------------|------------|-------------------|----------------------|-------------------------------------|-------------------|----------------------|--------------------------------------|-------------------|----------------------|
|                 | N          | Median (Range)    | p-value <sup>3</sup> | N                                   | Median (Range)    | p-value <sup>3</sup> | N                                    | Median (Range)    | p-value <sup>3</sup> |
| Baseline        | 55         | 15.0 (7.0, 300.0) | -                    | 26                                  | 16.5 (7.0, 300.0) | -                    | 20                                   | 16.0 (7.0, 300.0) | -                    |
| Day 56          | 44         | 14.5 (6.0, 300.0) | 0.324                | 23                                  | 15.0 (0.0, 300.0) | 0.823                | 10                                   | 15.0 (7.0, 300.0) | 0.836                |
| Day 180         | 36         | 13.5 (5.0, 300.0) | 0.622                | 17                                  | 13.0 (6.0, 300.0) | 0.820                | 3                                    | 13.0 (8.0, 27.0)  | 1.000                |

Note: For participants that could not complete the 5 Time Sit-to-Stand Test, a time of 300 seconds was recorded. Medians should be interpreted as restricted medians.

<sup>1</sup> Sirolimus arm patients that did not receive steroids before Day 56 post-randomization

<sup>2</sup> Sirolimus arm patients that did receive steroids before Day 56 post-randomization

<sup>3</sup> Wilcoxon signed rank tests on changes in scores from baseline within each group

| P-values <sup>4</sup> for Comparisons of Change Scores in Sit-to-Stand Test |                 |         |
|-----------------------------------------------------------------------------|-----------------|---------|
|                                                                             | Assessment Time |         |
|                                                                             | Day 56          | Day 180 |
| Prednisone vs. Sirolimus, No Steroids                                       | 1.000           | 1.000   |
| Prednisone vs. Sirolimus, Got Steroids                                      | 1.000           | 1.000   |
| Sirolimus, No Steroids vs. Sirolimus, Got Steroids                          | 1.000           | 1.000   |

<sup>4</sup> Wilcoxon rank sum tests were used to compare changes in scores from baseline between each pair of treatment groups. Across each time point, p-values are Bonferroni-corrected for the three pairwise comparisons.

(E) Adult Myopathy Assessment Tool (AMAT) Score

| Assessment Time | Prednisone |                  |                      | Sirolimus, No Steroids <sup>1</sup> |                   |                      | Sirolimus, Got Steroids <sup>2</sup> |                   |                      |
|-----------------|------------|------------------|----------------------|-------------------------------------|-------------------|----------------------|--------------------------------------|-------------------|----------------------|
|                 | N          | Median (Range)   | p-value <sup>3</sup> | N                                   | Median (Range)    | p-value <sup>3</sup> | N                                    | Median (Range)    | p-value <sup>3</sup> |
| Baseline        | 55         | 17.0 (8.0, 18.0) | -                    | 26                                  | 16.5 (10.0, 18.0) | -                    | 19                                   | 17.0 (9.0, 18.0)  | -                    |
| Day 56          | 44         | 18.0 (0.0, 18.0) | 0.975                | 23                                  | 18.0 (0.0, 18.0)  | 0.219                | 10                                   | 18.0 (11.0, 18.0) | 0.375                |
| Day 180         | 36         | 18.0 (6.0, 18.0) | 0.645                | 17                                  | 18.0 (14.0, 18.0) | 0.135                | 4                                    | 17.0 (16.0, 18.0) | 1.000                |

<sup>1</sup> Sirolimus arm patients that did not receive steroids before Day 56 post-randomization

<sup>2</sup> Sirolimus arm patients that did receive steroids before Day 56 post-randomization

<sup>3</sup> Wilcoxon signed rank tests on changes in scores from baseline within each group

| P-values <sup>4</sup> for Comparisons of Change Scores in AMAT |                 |         |
|----------------------------------------------------------------|-----------------|---------|
|                                                                | Assessment Time |         |
|                                                                | Day 56          | Day 180 |
|                                                                |                 |         |

|                                                           |       |       |
|-----------------------------------------------------------|-------|-------|
| <b>Prednisone vs. Sirolimus, No Steroids</b>              | 0.693 | 0.321 |
| <b>Prednisone vs. Sirolimus, Got Steroids</b>             | 1.000 | 1.000 |
| <b>Sirolimus, No Steroids vs. Sirolimus, Got Steroids</b> | 1.000 | 1.000 |

<sup>4</sup> Wilcoxon rank sum tests were used to compare changes in scores from baseline between each pair of treatment groups. Across each time point, p-values are Bonferroni-corrected for the three pairwise comparisons.

**Supplemental table 6: Change from baseline to subsequent measures and comparison of change across study groups for patient-reported outcomes: (a) SF-36 physical component summary (PCS) score. (b) SF-36 mental component summary (MCS) score. (c) FACT-BMT total score. (d) FACT-BMT Trial Outcome Index (TOI) Score. (e) MDASI Mean Core Symptom Severity Score. (f) MDASI Mean Interference Score.**

(a)

| Assessment Time | Prednisone Arm (N=64) |      |     |        |              |                      | Sirolimus Arm (N=58) |      |     |        |              |                      | Treatment Comparison p-value <sup>2</sup> |
|-----------------|-----------------------|------|-----|--------|--------------|----------------------|----------------------|------|-----|--------|--------------|----------------------|-------------------------------------------|
|                 | N                     | Mean | SE  | Median | Range        | p-value <sup>1</sup> | N                    | Mean | SE  | Median | Range        | p-value <sup>1</sup> |                                           |
| Baseline        | 56                    | 35.2 | 1.4 | 32.9   | (14.9, 55.7) | -                    | 48                   | 33.3 | 1.3 | 33.5   | (6.2, 55.1)  | -                    | -                                         |
| Day 56          | 49                    | 36.8 | 1.3 | 35.9   | (18.9, 53.9) | 0.139                | 30                   | 38.9 | 1.7 | 38.4   | (22.6, 57.5) | 0.002                | 0.329                                     |
| Day 180         | 35                    | 38.9 | 1.6 | 37.3   | (23.4, 54.9) | 0.037                | 26                   | 43.8 | 1.9 | 44.8   | (20.4, 58.1) | 0.000                | 0.012                                     |
| Day 365         | 32                    | 41.3 | 1.8 | 40.9   | (17.8, 57.5) | 0.021                | 26                   | 42.2 | 2.0 | 43.4   | (23.9, 56.4) | 0.002                | 0.480                                     |

\* SF36 Standard, US Version 2.0

<sup>1</sup> One sample t-test of changes in scores from baseline within each arm

<sup>2</sup> Independent samples t-tests comparing changes in scores from baseline between arms

(b)

| Assessment Time | Prednisone Arm (N=64) |      |     |        |              |                      | Sirolimus Arm (N=58) |      |     |        |              |                      | Treatment Comparison p-value <sup>2</sup> |
|-----------------|-----------------------|------|-----|--------|--------------|----------------------|----------------------|------|-----|--------|--------------|----------------------|-------------------------------------------|
|                 | N                     | Mean | SE  | Median | Range        | p-value <sup>1</sup> | N                    | Mean | SE  | Median | Range        | p-value <sup>1</sup> |                                           |
| Baseline        | 56                    | 43.3 | 1.6 | 44.2   | (18.5, 63.3) | -                    | 48                   | 46.9 | 1.4 | 48.3   | (19.5, 63.0) | -                    | -                                         |
| Day 56          | 49                    | 44.0 | 1.7 | 45.9   | (16.9, 65.1) | 0.783                | 30                   | 51.7 | 1.9 | 53.2   | (27.3, 66.4) | 0.078                | 0.175                                     |
| Day 180         | 35                    | 48.2 | 1.6 | 48.8   | (25.7, 63.0) | 0.008                | 26                   | 53.2 | 1.5 | 54.0   | (39.3, 65.0) | 0.005                | 0.671                                     |
| Day 365         | 32                    | 47.9 | 2.1 | 48.6   | (19.5, 66.8) | 0.110                | 26                   | 53.7 | 1.6 | 56.3   | (31.5, 62.6) | 0.004                | 0.657                                     |

\* SF36 Standard, US Version 2.0

<sup>1</sup> One sample t-test of changes in scores from baseline within each arm

<sup>2</sup> Independent samples t-tests comparing changes in scores from baseline between arms

(c)

| Assessment Time | Prednisone Arm (N=64) |       |     |        |               |                      | Sirolimus Arm (N=58) |       |     |        |               |                      | Treatment Comparison p-value <sup>2</sup> |
|-----------------|-----------------------|-------|-----|--------|---------------|----------------------|----------------------|-------|-----|--------|---------------|----------------------|-------------------------------------------|
|                 | N                     | Mean  | SE  | Median | Range         | p-value <sup>1</sup> | N                    | Mean  | SE  | Median | Range         | p-value <sup>1</sup> |                                           |
| Baseline        | 55                    | 94.4  | 2.9 | 93.0   | (53.0, 136.0) | -                    | 46                   | 96.3  | 2.8 | 96.5   | (49.5, 139.0) | -                    | -                                         |
| Day 56          | 49                    | 100.6 | 2.7 | 101.0  | (66.0, 138.0) | 0.034                | 31                   | 106.9 | 3.3 | 108.0  | (68.8, 139.0) | 0.017                | 0.406                                     |
| Day 180         | 37                    | 104.4 | 3.3 | 101.0  | (65.3, 139.0) | 0.000                | 26                   | 115.0 | 4.2 | 120.9  | (71.8, 144.0) | 0.000                | 0.135                                     |
| Day 365         | 33                    | 103.7 | 4.5 | 107.0  | (45.0, 144.0) | 0.036                | 28                   | 112.5 | 4.4 | 116.0  | (61.9, 146.0) | 0.001                | 0.269                                     |

<sup>1</sup> FACT-BMT version 4.0

<sup>1</sup> One sample t-test of changes in scores from baseline within each arm

<sup>2</sup> Independent samples t-tests comparing changes in scores from baseline between arms

(d)

| Assessment Time | Prednisone Arm (N=64) |      |     |        |              |                      | Sirolimus Arm (N=58) |      |     |        |              |                      | Treatment Comparison p-value <sup>2</sup> |
|-----------------|-----------------------|------|-----|--------|--------------|----------------------|----------------------|------|-----|--------|--------------|----------------------|-------------------------------------------|
|                 | N                     | Mean | SE  | Median | Range        | p-value <sup>1</sup> | N                    | Mean | SE  | Median | Range        | p-value <sup>1</sup> |                                           |
| Baseline        | 55                    | 53.8 | 2.3 | 54.0   | (20.0, 86.0) | -                    | 46                   | 52.6 | 2.2 | 53.0   | (22.5, 88.0) | -                    | -                                         |
| Day 56          | 49                    | 59.5 | 2.0 | 60.0   | (33.0, 87.0) | 0.013                | 31                   | 63.1 | 2.6 | 64.0   | (37.0, 90.0) | 0.001                | 0.204                                     |
| Day 180         | 37                    | 62.8 | 2.5 | 60.0   | (36.0, 89.0) | 0.000                | 26                   | 71.2 | 3.1 | 73.1   | (42.0, 92.0) | 0.000                | 0.034                                     |
| Day 365         | 33                    | 64.1 | 3.3 | 66.4   | (24.0, 93.0) | 0.017                | 28                   | 69.8 | 3.1 | 72.0   | (35.9, 94.0) | 0.000                | 0.155                                     |

<sup>1</sup> FACT-BMT version 4.0

<sup>1</sup> One sample t-test of changes in scores from baseline within each arm

<sup>2</sup> Independent samples t-tests comparing changes in scores from baseline between arms

(e)

|                 | Prednisone Arm<br>(N=64) |      |      |        |              |                      | Sirolimus Arm<br>(N=58) |      |      |        |              |                      |                                           |
|-----------------|--------------------------|------|------|--------|--------------|----------------------|-------------------------|------|------|--------|--------------|----------------------|-------------------------------------------|
| Assessment Time | N                        | Mean | SE   | Median | Range        | p-value <sup>1</sup> | N                       | Mean | SE   | Median | Range        | p-value <sup>1</sup> | Treatment Comparison p-value <sup>2</sup> |
| Baseline        | 57                       | 2.93 | 0.27 | 2.54   | (0.15, 7.38) | -                    | 48                      | 3.08 | 0.20 | 3.04   | (0.85, 6.46) | -                    | -                                         |
| Day 56          | 52                       | 2.13 | 0.24 | 1.85   | (0.00, 7.69) | 0.013                | 32                      | 2.02 | 0.26 | 1.62   | (0.15, 5.77) | 0.002                | 0.301                                     |
| Day 180         | 37                       | 1.85 | 0.27 | 1.23   | (0.15, 6.69) | 0.007                | 26                      | 1.68 | 0.32 | 1.31   | (0.00, 7.46) | 0.000                | 0.219                                     |
| Day 365         | 31                       | 1.93 | 0.32 | 1.15   | (0.00, 7.77) | 0.333                | 27                      | 1.77 | 0.30 | 1.08   | (0.23, 7.15) | 0.001                | 0.151                                     |

<sup>1</sup> MDASI version 1.0

<sup>1</sup> One sample t-test of changes in scores from baseline within each arm

<sup>2</sup> Independent samples t-tests comparing changes in scores from baseline between arms

(f)

|                 | Prednisone Arm<br>(N=64) |      |      |        |               |                      | Sirolimus Arm<br>(N=58) |      |      |        |              |                      |                                           |
|-----------------|--------------------------|------|------|--------|---------------|----------------------|-------------------------|------|------|--------|--------------|----------------------|-------------------------------------------|
| Assessment Time | N                        | Mean | SE   | Median | Range         | p-value <sup>1</sup> | N                       | Mean | SE   | Median | Range        | p-value <sup>1</sup> | Treatment Comparison p-value <sup>2</sup> |
| Baseline        | 56                       | 3.50 | 0.36 | 2.92   | (0.00, 10.00) | -                    | 47                      | 3.66 | 0.33 | 3.33   | (0.00, 8.17) | -                    | -                                         |
| Day 56          | 52                       | 3.21 | 0.37 | 2.67   | (0.00, 9.83)  | 0.770                | 32                      | 2.71 | 0.35 | 2.50   | (0.00, 7.17) | 0.043                | 0.283                                     |
| Day 180         | 37                       | 2.59 | 0.41 | 2.00   | (0.00, 8.33)  | 0.017                | 26                      | 2.06 | 0.51 | 1.00   | (0.00, 9.50) | 0.001                | 0.289                                     |
| Day 365         | 31                       | 2.68 | 0.50 | 2.00   | (0.00, 10.00) | 0.204                | 27                      | 1.76 | 0.38 | 1.33   | (0.00, 6.83) | 0.016                | 0.502                                     |

<sup>1</sup> MDASI version 1.0

<sup>1</sup> One sample t-test of changes in scores from baseline within each arm

<sup>2</sup> Independent samples t-tests comparing changes in scores from baseline between arms



**Supplemental table 7: Acute GVHD biopsy information for AA1/2 patients**

|                                                                        | Treatment Arm |            | Total      |
|------------------------------------------------------------------------|---------------|------------|------------|
|                                                                        | Prednisone    | Sirolimus  |            |
| <b>Skin Biopsy Results (N=83)</b>                                      |               |            |            |
| Positive                                                               | 19 (42.2%)    | 18 (47.4%) | 37 (44.6%) |
| Negative                                                               | 4 (8.9%)      | 4 (10.5%)  | 8 (9.6%)   |
| Equivocal                                                              | 2 (4.4%)      | 1 (2.6%)   | 3 (3.6%)   |
| Not Done                                                               | 20 (44.5%)    | 15 (39.5%) | 35 (42.2%) |
| <b>Upper GI Biopsy Results (N=54)</b>                                  |               |            |            |
| Positive                                                               | 8 (28.6%)     | 8 (30.8%)  | 16 (29.6%) |
| Negative                                                               | 2 (7.1%)      | 0 (0.0%)   | 2 (3.7%)   |
| Equivocal                                                              | 1 (3.6%)      | 0 (0.0%)   | 1 (1.9%)   |
| Not Done                                                               | 17 (60.7%)    | 18 (69.2%) | 35 (64.8%) |
| <b>Upper GI Biopsy Results, Isolated UGI GVHD Patients only (N=31)</b> |               |            |            |
| Positive                                                               | 5 (38.5%)     | 7 (38.9%)  | 12 (38.7%) |
| Negative                                                               | 0 (0.0%)      | 0 (0.0%)   | 0 (0.0%)   |
| Equivocal                                                              | 0 (0.0%)      | 0 (0.0%)   | 0 (0.0%)   |
| Not Done                                                               | 8 (61.5%)     | 11 (61.1%) | 19 (61.3%) |
| <b>Lower GI Biopsy Results (N=23)</b>                                  |               |            |            |
| Positive                                                               | 2 (11.1%)     | 2 (40.0%)  | 4 (17.4%)  |
| Negative                                                               | 1 (5.6%)      | 0 (0.0%)   | 1 (4.3%)   |
| Equivocal                                                              | 2 (11.1%)     | 0 (0.0%)   | 2 (8.7%)   |
| Not Done                                                               | 13 (72.2%)    | 3 (60.0%)  | 16 (69.6%) |
| <b>Liver Biopsy Results (N=1)</b>                                      |               |            |            |
| Not Done                                                               | 1 (100.0%)    | 0 (0.0%)   | 1 (100.0%) |

**Supplemental table 8: Sirolimus Trough Levels (ng/mL) in Sirolimus Arm Patients**

|                        | <b>Skin Involvement Only at Baseline<br/>(N=31)</b> |             |               |                            |               |
|------------------------|-----------------------------------------------------|-------------|---------------|----------------------------|---------------|
| <b>Assessment Time</b> | <b>N</b>                                            | <b>Mean</b> | <b>Median</b> | <b>Interquartile Range</b> | <b>Range</b>  |
| Day 7                  | 30                                                  | 8.18        | 7.50          | (4.40, 10.80)              | (0.00, 26.40) |
| Day 14                 | 30                                                  | 8.00        | 9.60          | (3.20, 11.90)              | (0.00, 21.70) |
| Day 21                 | 30                                                  | 6.21        | 6.30          | (0.00, 10.70)              | (0.00, 15.90) |
| Day 28                 | 28                                                  | 5.73        | 6.40          | (0.00, 11.30)              | (0.00, 15.60) |
| Day 35                 | 26                                                  | 5.84        | 7.25          | (0.00, 9.20)               | (0.00, 14.90) |
| Day 42                 | 27                                                  | 3.91        | 3.80          | (0.00, 6.90)               | (0.00, 14.20) |
| Day 49                 | 27                                                  | 3.78        | 3.00          | (0.00, 7.80)               | (0.00, 12.10) |
| Day 56                 | 24                                                  | 2.93        | 0.90          | (0.00, 5.25)               | (0.00, 11.30) |
|                        | <b>Any GI Involvement at Baseline<br/>(N=27)</b>    |             |               |                            |               |
| <b>Assessment Time</b> | <b>N</b>                                            | <b>Mean</b> | <b>Median</b> | <b>Interquartile Range</b> | <b>Range</b>  |
| Day 7                  | 25                                                  | 7.86        | 7.00          | (4.20, 10.90)              | (0.00, 27.50) |
| Day 14                 | 25                                                  | 7.73        | 7.60          | (5.74, 10.70)              | (0.00, 15.20) |
| Day 21                 | 24                                                  | 7.56        | 7.85          | (4.25, 9.25)               | (0.00, 23.00) |
| Day 28                 | 25                                                  | 6.93        | 8.00          | (3.80, 9.10)               | (0.00, 21.40) |
| Day 35                 | 25                                                  | 6.11        | 6.20          | (5.00, 8.20)               | (0.00, 21.50) |
| Day 42                 | 23                                                  | 5.81        | 6.90          | (0.00, 9.70)               | (0.00, 14.00) |
| Day 49                 | 23                                                  | 5.68        | 6.40          | (0.00, 9.70)               | (0.00, 16.20) |
| Day 56                 | 23                                                  | 5.20        | 5.60          | (0.00, 9.90)               | (0.00, 13.90) |

**Supplemental figures:**

**Supplemental figure 1: Sub-group analyses examining difference in day 28 CR/PR rates between study arms. (a) Response according to presenting acute GVHD features. (b) Response according to transplant donor, graft source, and HLA match status.**

**(a)**

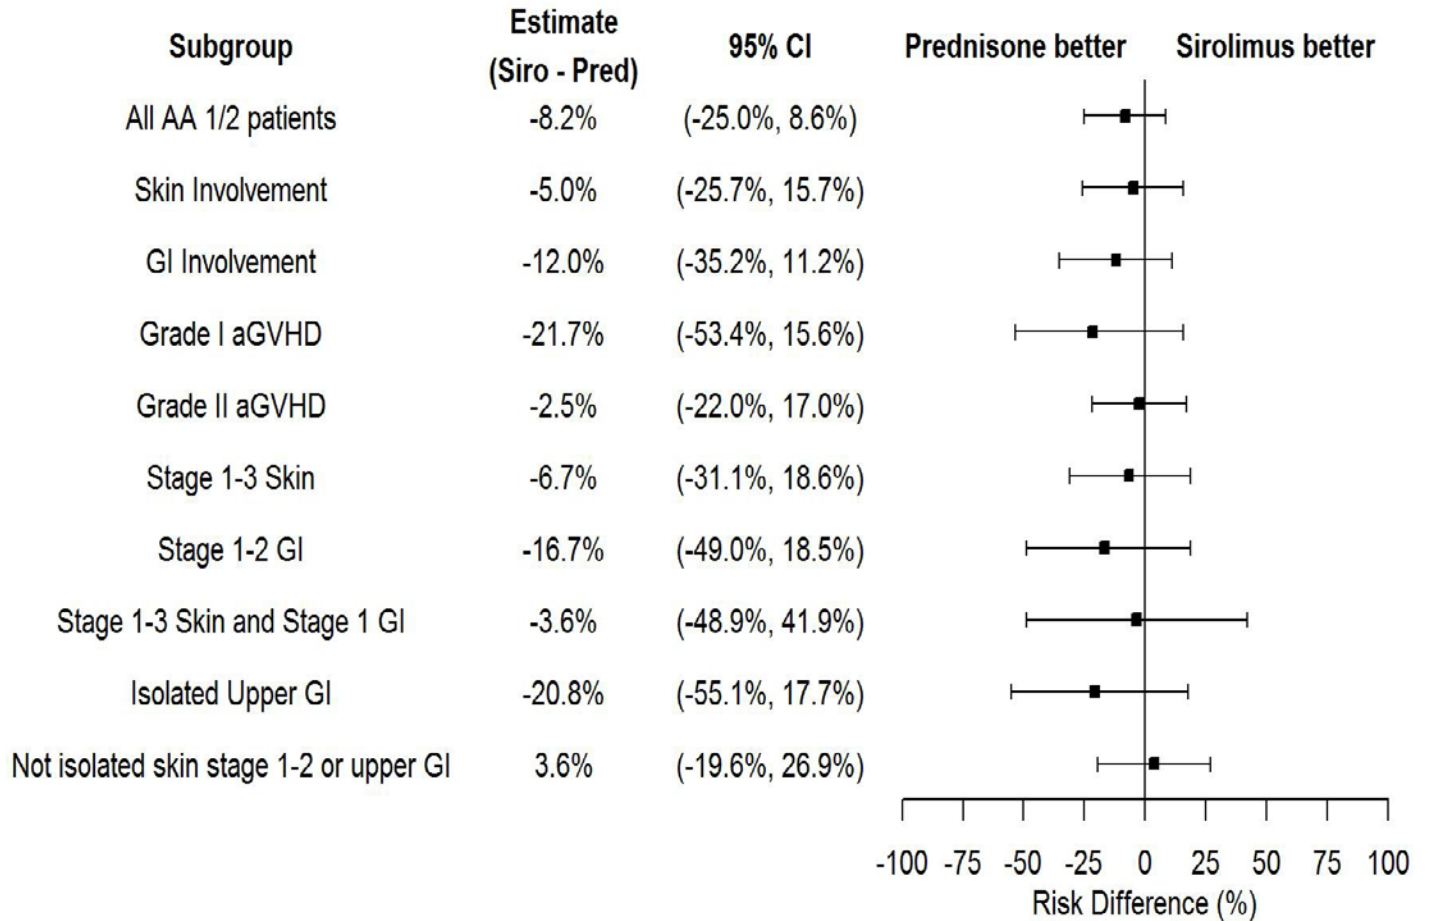

(b)

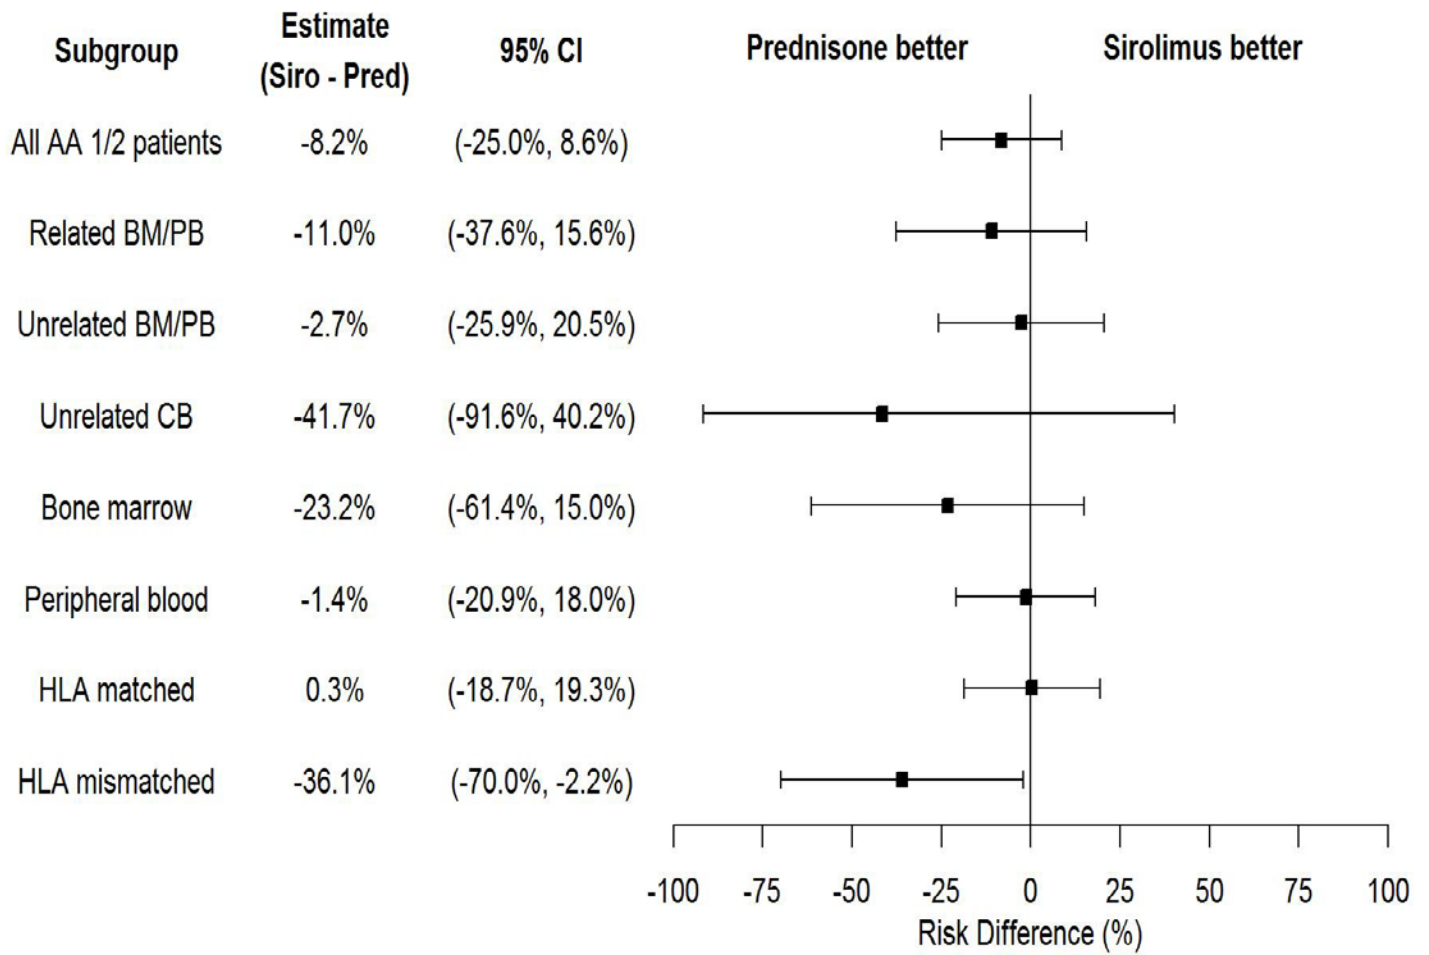

Supplement: bloodBLD2019003125-suppl1.pdf [file bloodBLD2019003125-suppl1.pdf]
